## CORRECTION

# Correction: Impact of self-imposed prevention measures and short-term government-imposed social distancing on mitigating and delaying a COVID-19 epidemic: A modelling study

The *PLOS Medicine* Staff

There were transcription errors which resulted in incorrect rendering of some symbols in [Table 1](#). Please see the corrected [Table 1](#). The publisher apologizes for the error.

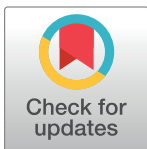

---

## OPEN ACCESS

**Citation:** The *PLOS Medicine* Staff (2020) Correction: Impact of self-imposed prevention measures and short-term government-imposed social distancing on mitigating and delaying a COVID-19 epidemic: A modelling study. *PLoS Med* 17(12): e1003499. <https://doi.org/10.1371/journal.pmed.1003499>

**Published:** December 4, 2020

**Copyright:** © 2020 The PLOS Medicine Staff. This is an open access article distributed under the terms of the [Creative Commons Attribution License](#), which permits unrestricted use, distribution, and reproduction in any medium, provided the original author and source are credited.

**Table 1. Parameter values for the transmission model with and without awareness.**

| Parameters                                                                         | Value*                                                    | Source                                                                     |
|------------------------------------------------------------------------------------|-----------------------------------------------------------|----------------------------------------------------------------------------|
| <b>Epidemiological parameters</b>                                                  |                                                           |                                                                            |
| Basic reproduction number                                                          | $R_0$ 2.5 (2–3)                                           | Li and colleagues [5], Park and colleagues [30], sensitivity analyses      |
| Probability of transmission per contact with $I_S$                                 | $\epsilon$ 0.048                                          | From $R_0 = \beta[p\sigma/\gamma_M + (1-p)/v]$                             |
| Transmission rate of infection via contact with $I_S$                              | $\beta$ 0.66 per day                                      | $\beta = c\epsilon$                                                        |
| Average contact rate (unique persons)                                              | $c$ 13.85 persons per day                                 | Mossong and colleagues [31]                                                |
| Relative infectivity of infectious with mild disease ( $I_M$ )                     | $\sigma$ 50% (25%–75%)                                    | Assumed, see, e.g., Liu and colleagues [29], sensitivity analyses          |
| Proportion of infectious with mild disease ( $I_M$ )                               | $p$ 82% (82%–90%)                                         | Wu and colleagues [32], Anderson and colleagues [20], sensitivity analyses |
| Delay between infection and onset of infectiousness (latent period)                | $1/\alpha$ 4 days                                         | Shorter than incubation period [5, 30, 33]                                 |
| Delay from onset of infectiousness to diagnosis for $I_S$                          | $1/v$ 5 (3–7) days                                        | Li and colleagues [5], sensitivity analyses                                |
| Recovery period of infectious with mild disease ( $I_M$ )                          | $1/\gamma_M$ 7 (5–9) days                                 | Li Xingwang <sup>†</sup> , sensitivity analyses                            |
| Delay from diagnosis to recovery for unaware diagnosed ( $I_D$ )                   | $1/\gamma_S$ 14 days                                      | WHO [34]                                                                   |
| Relative infectivity of isolated ( $I_D$ )                                         | 0%                                                        | Assuming perfect isolation                                                 |
| Case fatality rate of unaware diagnosed ( $I_D$ )                                  | $f$ 1.6%                                                  | Althaus and colleagues [35] Park and colleagues [30]                       |
| Disease-associated death rate of unaware diagnosed ( $I_D$ )                       | $\eta$ 0.0011 per day                                     | $\eta = \gamma_S f / (1-f)$                                                |
| <b>Awareness parameters</b>                                                        |                                                           |                                                                            |
| Rate of awareness spread (slow, fast and range)                                    | $\delta$ $5 \times 10^{-5}$ , 1 ( $10^{-6}$ – 1) per year | Assumed, sensitivity analyses                                              |
| Relative susceptibility to awareness acquisition for $S$ , $E$ , $I_M$ , and $R_M$ | $k$ 50% (0%–100%)                                         | Assumed, sensitivity analyses                                              |
| Duration of awareness for $S^a$ , $E^a$ , $I_M^a$ , and $R_M^a$                    | $1/\mu$ 30 (7–365) days                                   | Assumed, sensitivity analyses                                              |
| Duration of awareness for $I_S^a$                                                  | $1/\mu_S$ 60 (7–365) days                                 | Longer than $1/\mu$ , sensitivity analyses                                 |
| Delay from onset of infectiousness to diagnosis for $I_S^a$                        | $1/v^a$ 3 (1–5) days                                      | Shorter than $1/v$ , sensitivity analyses                                  |
| Delay from diagnosis to recovery of aware diagnosed ( $I_D^a$ )                    | $1/\gamma_S^a$ 12 days                                    | Shorter than $1/\gamma_S$                                                  |
| Case fatality rate of aware diagnosed ( $I_D^a$ )                                  | $f^a$ 1%                                                  | Smaller than $f$                                                           |
| Disease-associated death rate of aware diagnosed ( $I_D^a$ )                       | $\eta^a$ 0.0008 per day                                   | $\eta = \gamma_S^a f^a / (1 - f^a)$                                        |
| <b>Prevention measure parameters</b>                                               |                                                           |                                                                            |
| Efficacy of mask-wearing (reduction in infectivity)                                | 0%–100%                                                   | Varied                                                                     |
| Efficacy of handwashing (reduction in susceptibility)                              | 0%–100%                                                   | Varied                                                                     |
| Efficacy of self-imposed contact rate reduction                                    | 0%–100%                                                   | Varied                                                                     |
| Efficacy of government-imposed contact rate reduction                              | 0%–100%                                                   | Varied                                                                     |
| Duration of government-imposed social distancing                                   | 3 (1–13) months                                           | Assumed, sensitivity analyses                                              |

(Continued)

**Table 1.** (Continued)

| Parameters                                                       | Value*                 | Source                        |
|------------------------------------------------------------------|------------------------|-------------------------------|
| Threshold for initiation of government-imposed social distancing | 10 (1–1,000) diagnoses | Assumed, sensitivity analyses |

\*Mean or median values were used from literature; range was used in the sensitivity analyses.

†Expert at China's National Health Commission.

<https://doi.org/10.1371/journal.pmed.1003499.t001>

## Reference

1. Teslya A, Pham TM, Godijk NG, Kretzschmar ME, Bootsma MCJ, Rozhnova G (2020) Impact of self-imposed prevention measures and short-term government-imposed social distancing on mitigating and delaying a COVID-19 epidemic: A modelling study. *PLoS Med* 17(7): e1003166. <https://doi.org/10.1371/journal.pmed.1003166> PMID: 32692736
